# Supplementary material
Source: publisher figshare collection journal article supplement (https://acs.figshare.com/ndownloader/files/9537568)
Supplement: Supplementary file 1 [file 9537568]

# Supplementary Information

## Site-Specific Quantification of Protein Ubiquitination on MS2 Fragment Ion Level via Isobaric Peptide Labeling

Ting Cao<sup>1</sup>, Lei Zhang<sup>2</sup>, Ying Zhang<sup>2</sup>, Guoquan Yan<sup>1,2</sup>, Caiyun Fang<sup>1</sup>, Huimin Bao<sup>1</sup>, Haojie Lu<sup>1,2\*</sup>

<sup>1</sup> Shanghai Cancer Center and Department of Chemistry, Fudan University, Shanghai 200032, P. R. China

<sup>2</sup> Institutes of Biomedical Sciences and Key Laboratory of Glycoconjugates Research Ministry of Public Health, Fudan University, Shanghai 200032, P. R. China

E-mail: luhaojie@fudan.edu.cn.

### Content of SI materials

Figure S-1. Schematic diagram of quantification of the supernatant proteome after K-ε-GG enrichment.

Figure S-2. (A) Fraction of peptides with one or two di-glycine-lysines in the enriched dataset. (B) The distribution of proteins with different numbers of ubiquitination sites.

Figure S-3. Identification and quantification of supernatant proteome. Venn diagram showing the overlap of identified peptides (A, left) and proteins (A, right), quantified peptides (B, left) and proteins (B, right).

Figure S-4. Overlap of K-ε-GG peptides (A) and proteins (B) identified in K-ε-GG modified proteome and supernatant proteome.

Figure S-5. MS spectra of IWHHTFYNELR<sup>4</sup> (A, m/z 760.85) and HQGVMVGMGQK<sup>4</sup> (B, m/z 588.30) from tryptic digests of K<sup>4</sup>R<sup>4</sup> labeled MCF-7 cells.

Figure S-6. MALDI mass spectra of standard K-ε-GG peptide YDFFILNK(GG)LAK before derivatization (A) and after CH<sub>2</sub>O dimethylation (B) or CD<sub>2</sub>O dimethylation (C).

Figure S-7. Extracted ion chromatograms of b, y fragment ions derived from isobaric-labeled peptides <sup>(+28)</sup>DLMVGDEASELR<sup>(+4)</sup> and <sup>(+32)</sup>DLMVGDEASELR. Extracted ion chromatograms of the N-terminal lightly labeled b2-ion (<sup>(+28)</sup>DL, m/z 257.14) and the heavily labeled b2-ion (<sup>(+32)</sup>DL, m/z 261.17) (A and B), as well as that of C-terminal lightly or heavily labeled y8-ion (GDEASELR, m/z 876.40) and the heavily labeled y8-ion (GDEASELR, m/z 880.39) (C and D).

Figure S-8. Scatterplots and histograms for quantified K-ε-GG peptide ratios from experiment 1 versus 2 versus 3.

Figure S-9. MS/MS spectra of the peptide TITLEVEPSDTIENVK(GG)AK with the ratio of 1:1, 1:5 and 1:10.

Figure S-10. The extracted ion chromatograms of standard internal K-ε-GG peptides (A) YDFFILNK (GG) LAK and (B) NSSYVLLK(GG)TGK.

Table S-1. SILAC labeling efficiency of MCF-7 cells.

Table S-2. Labeling efficiency of peptide N-terminus dimethylation.

Excel S-1. K-ε-GG peptides identified in ubiquitinated proteome.

Excel S-2. Peptides identified in supernatant proteome.

Excel S-3. K-ε-GG peptides quantified in ubiquitinated proteome.

Excel S-4. Peptides quantified in supernatant proteome.

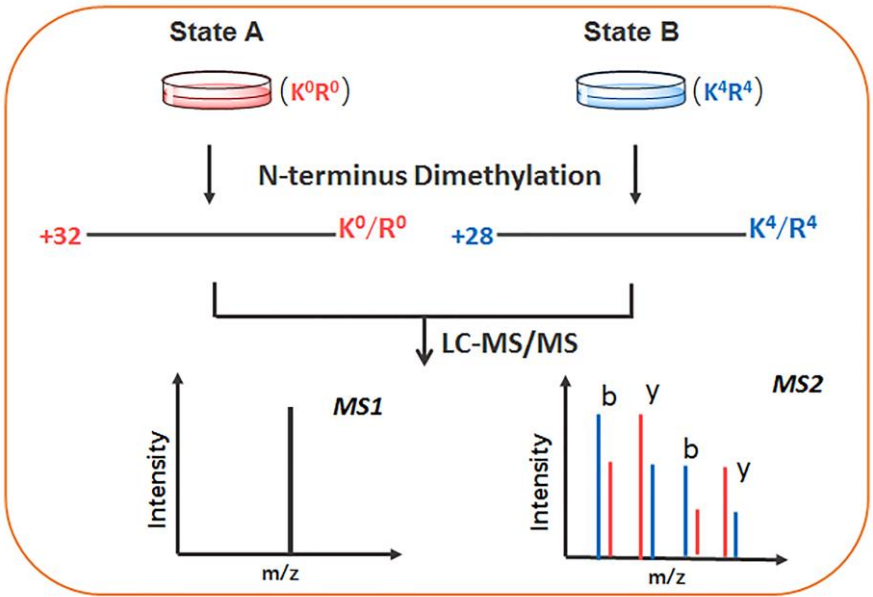

Figure S-1. Schematic diagram of quantification of the supernatant proteome after K-ε-GG enrichment.

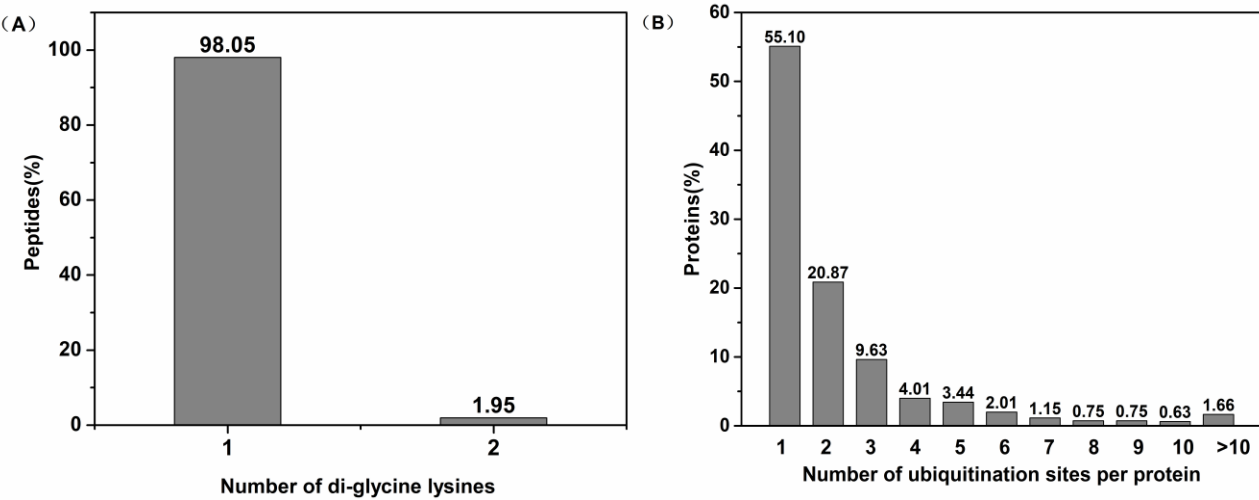

Figure S-2. (A) Fraction of peptides with one or two di-glycine-lysines in the enriched dataset. (B) The distribution of proteins with different numbers of ubiquitination sites.

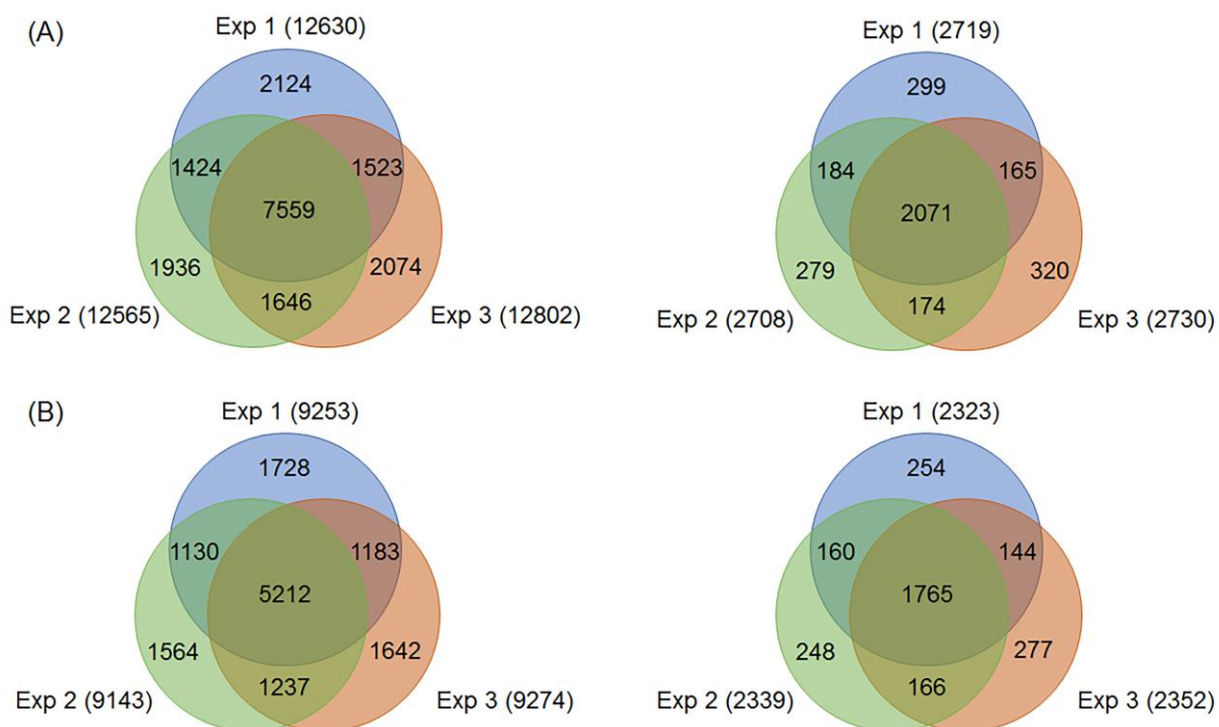

Figure S-3 Identification and quantification of supernatant proteome. Venn diagram showing the overlap of identified peptides (A, left) and proteins (A, right), quantified peptides (B, left) and proteins (B, right).

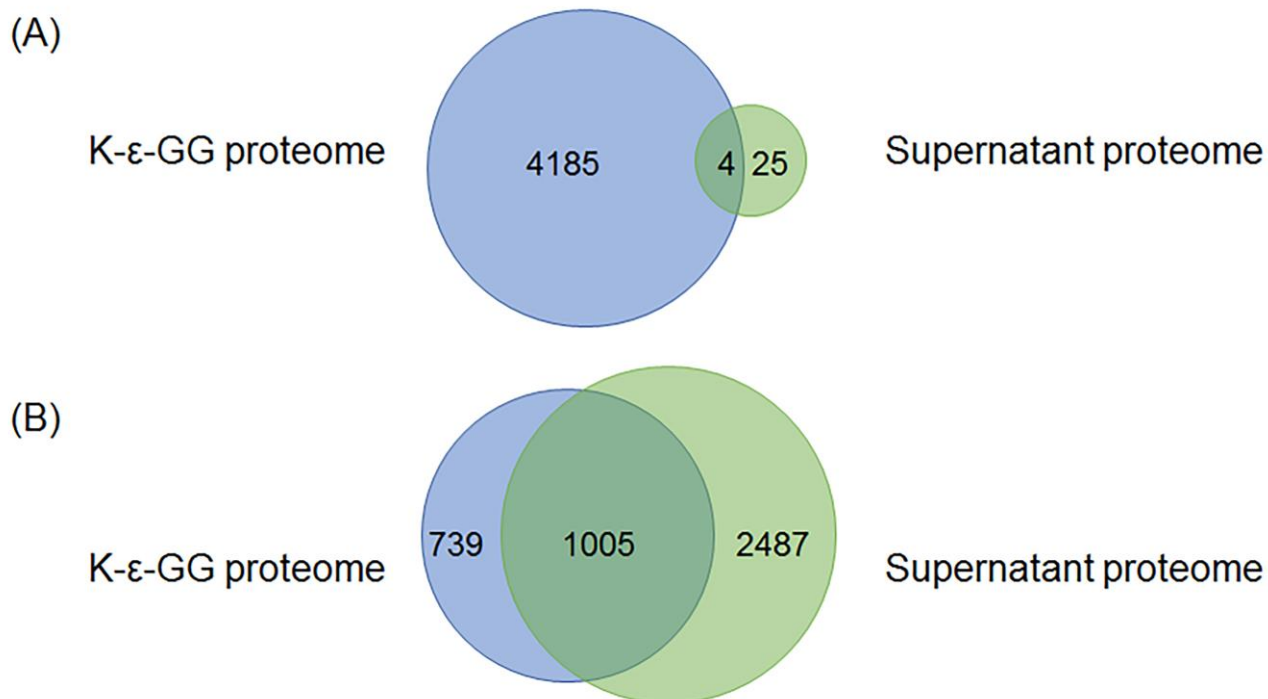

Figure S-4. Overlap of K-ε-GG peptides (A) and proteins (B) identified in K-ε-GG modified proteome and supernatant proteome.

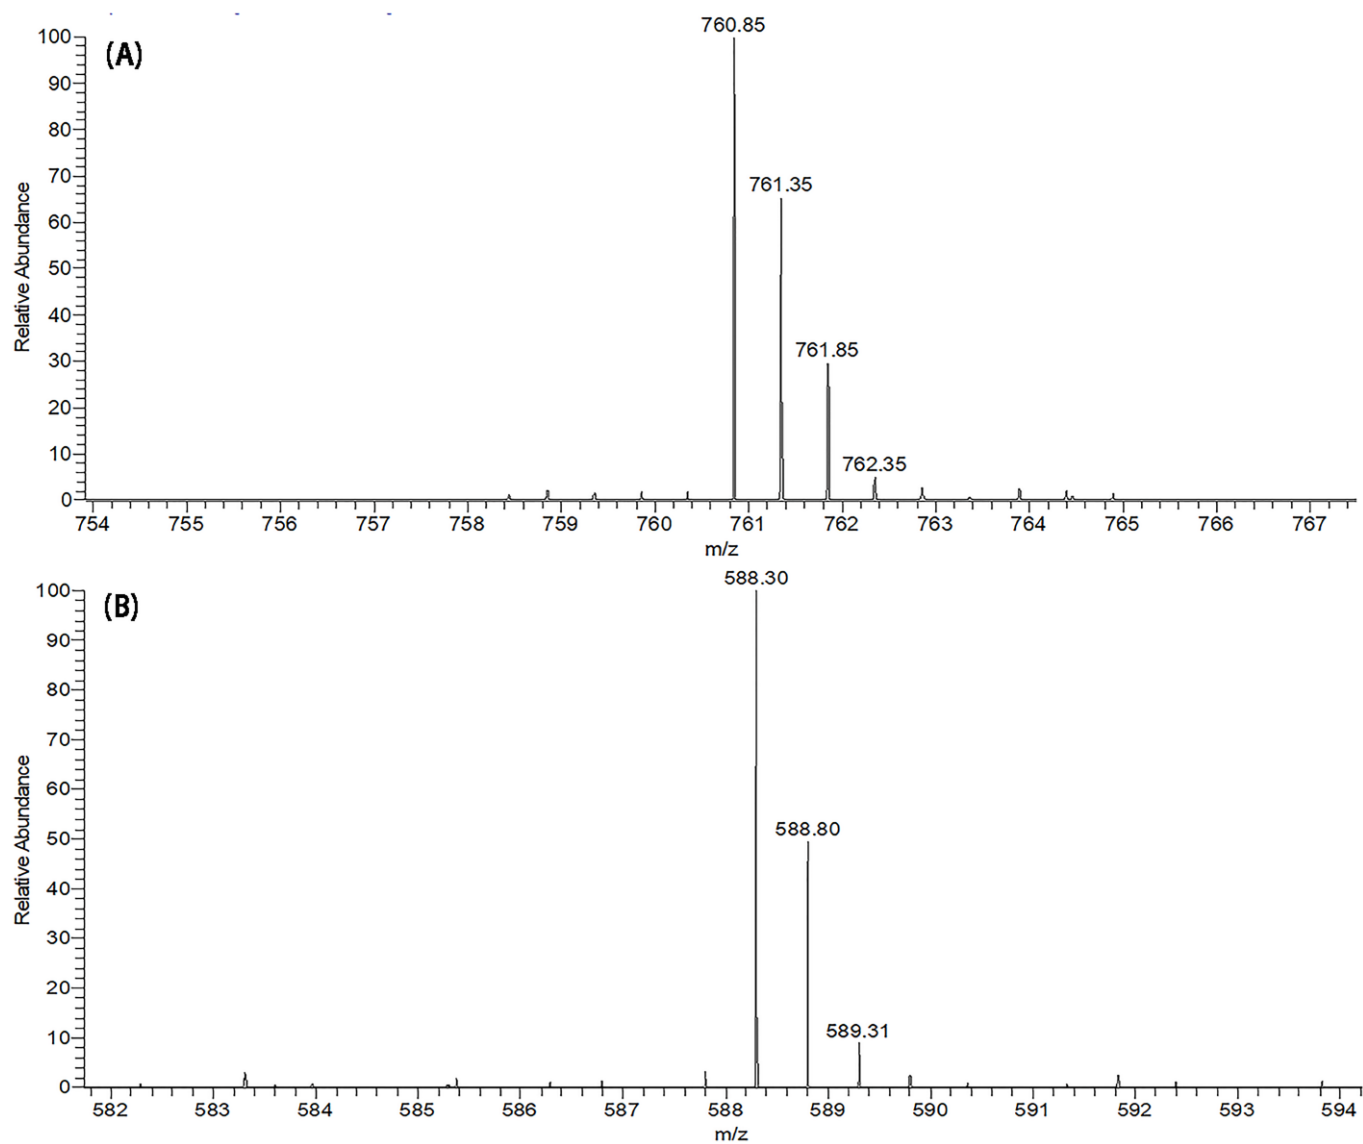

Figure S-5. MS spectra of IWHHTFYNELR<sup>4</sup> (A, m/z 760.85) and HQGVMVGMGQK<sup>4</sup> (B, m/z 588.30) from tryptic digests of K<sup>4</sup>R<sup>4</sup> labeled MCF-7 cells.

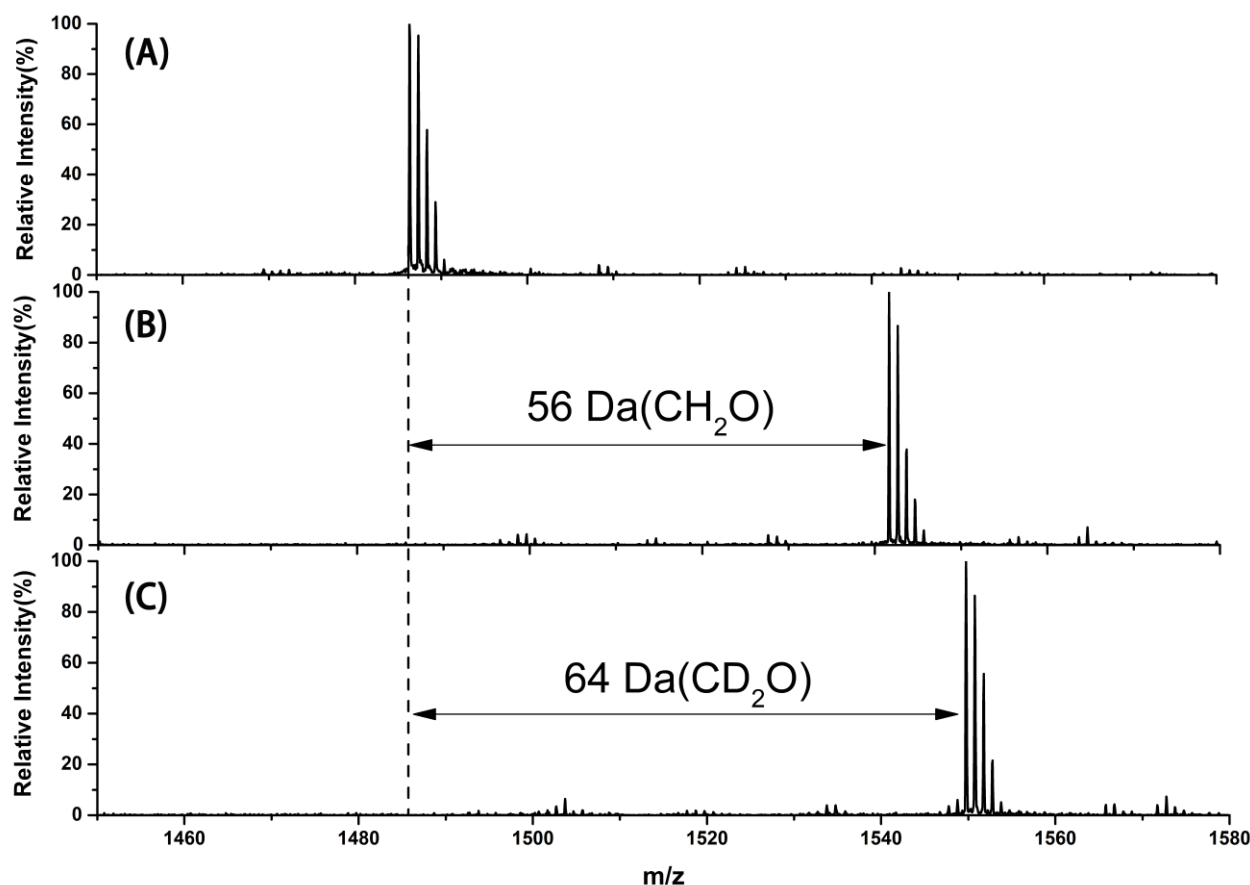

Figure S-6. MALDI mass spectra of standard K- $\epsilon$ -GG peptide YDFFILNK(GG)LAK before derivatization (A) and after CH<sub>2</sub>O dimethylation (B) or CD<sub>2</sub>O dimethylation (C).

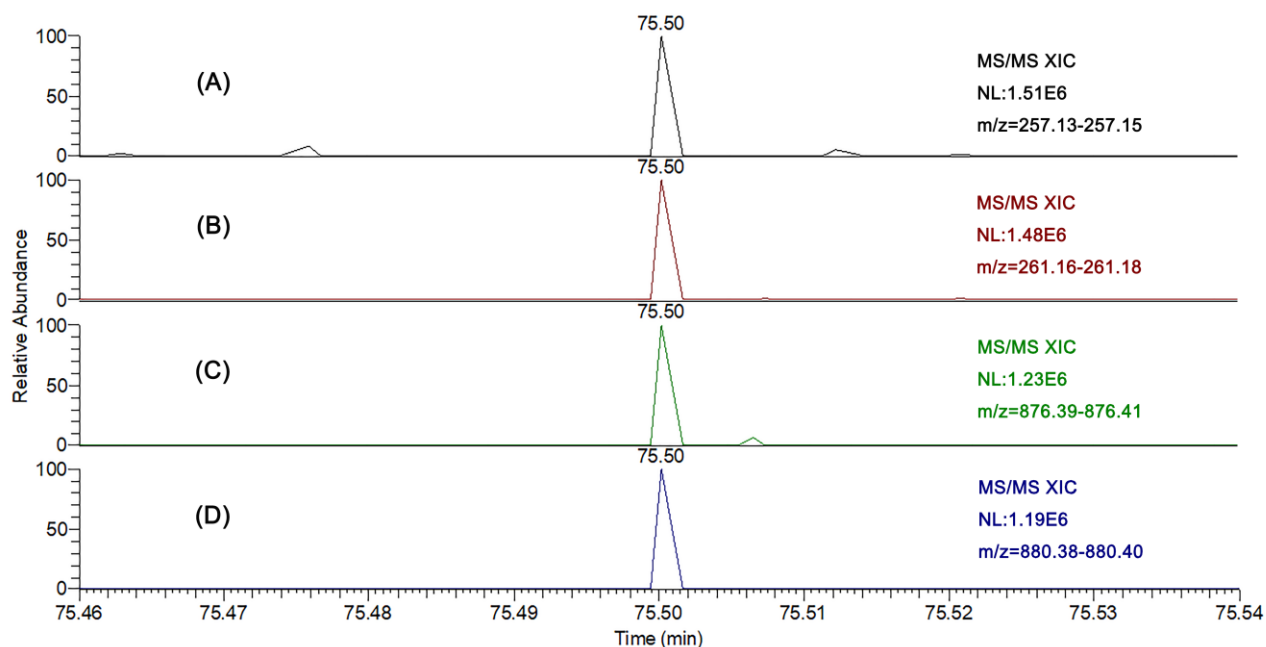

Figure S-7. Extracted ion chromatograms of b, y fragment ions derived from isobaric-labeled peptides  $(^{+28})$ DLMVGDEASELR $(^{+4})$  and  $(^{+32})$ DLMVGDEASELR. Extracted ion chromatograms of the N-terminal lightly labeled b2-ion ( $(^{+28})$ DL, m/z 257.14) and the heavily labeled b2-ion ( $(^{+32})$ DL, m/z 261.17) (A and B), as well as that of C-terminal lightly or heavily labeled y8-ion (GDEASELR, m/z 876.40) and the heavily labeled y8-ion (GDEASELR(+4), m/z 880.39)(C and D).

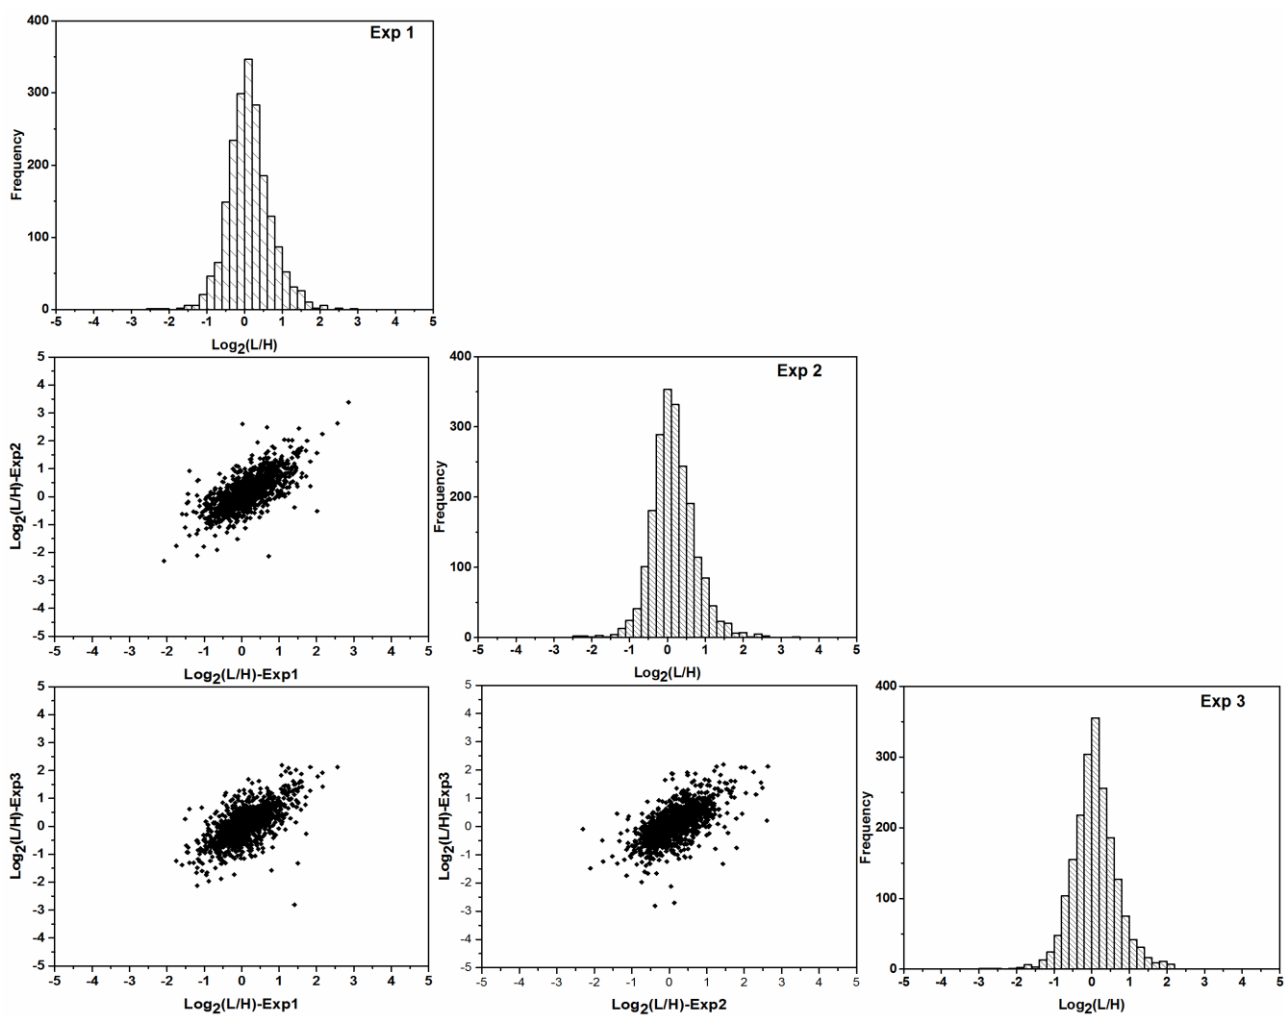

Figure S-8. Scatterplots and histograms for quantified K-ε-GG peptide ratios from experiment 1 versus 2 versus 3.

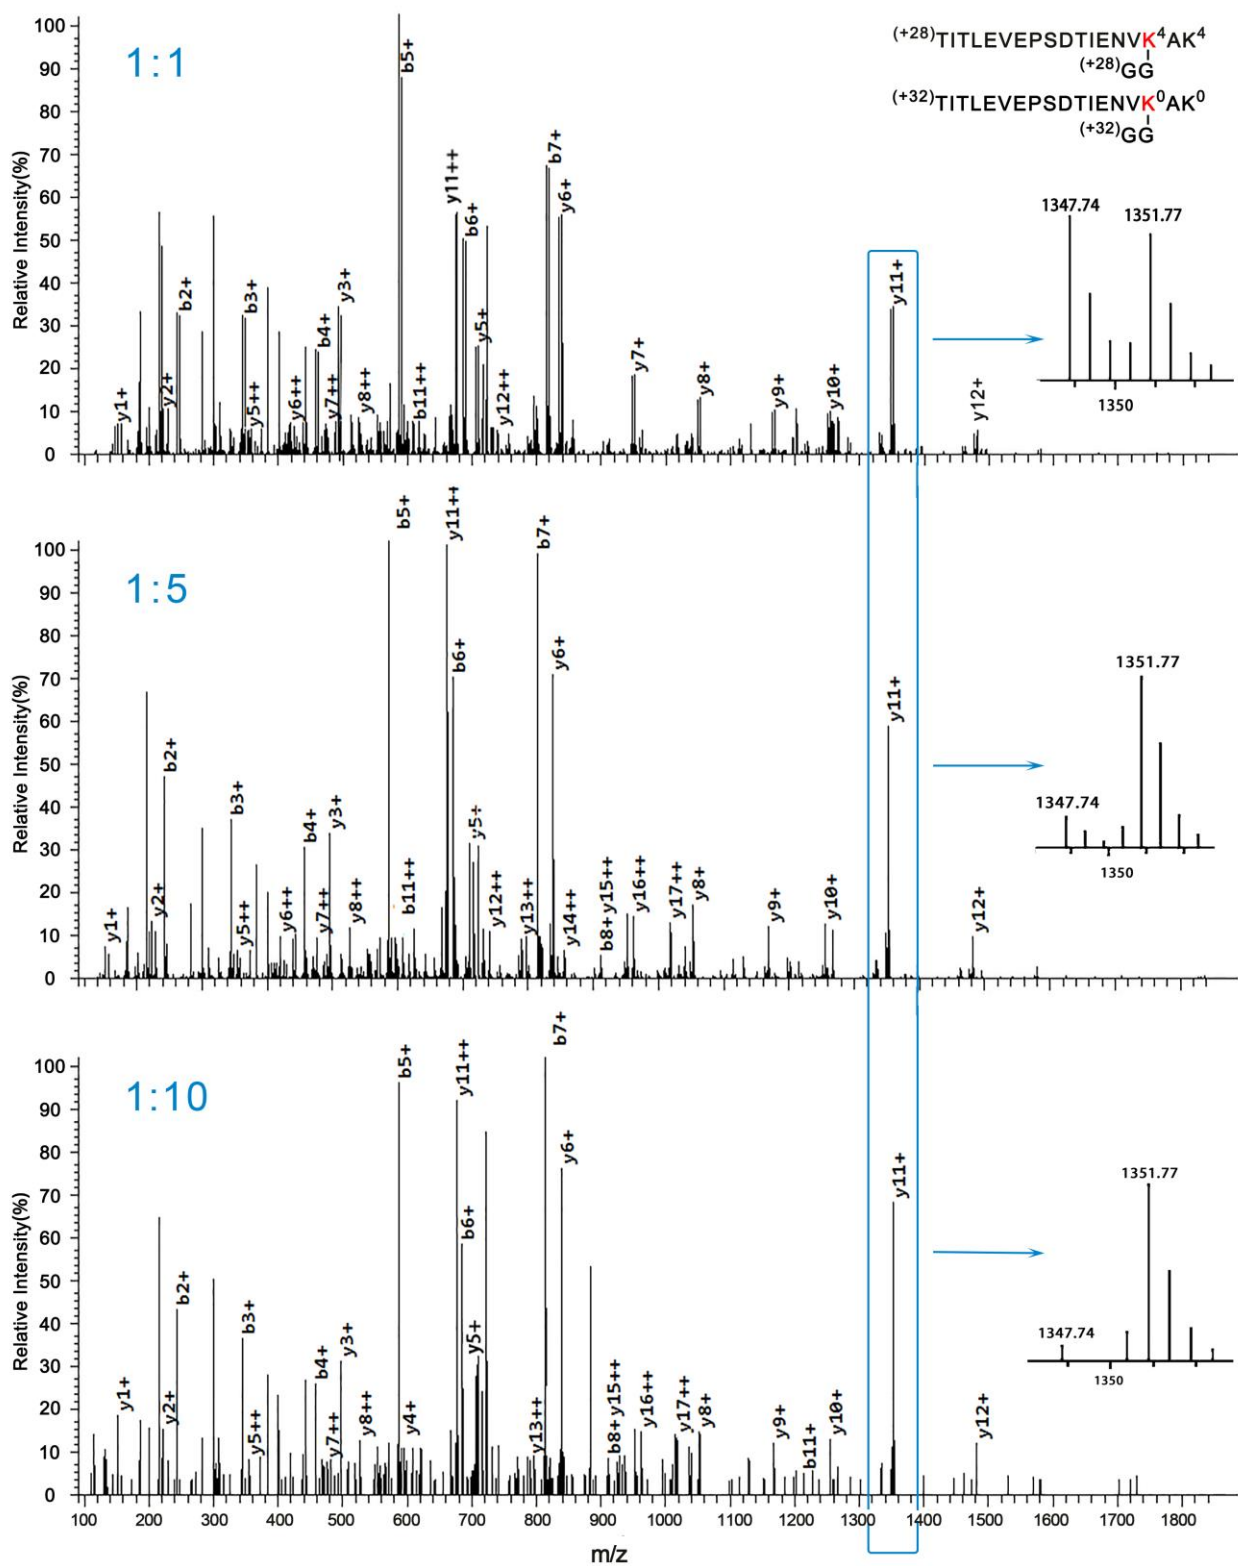

Figure S-9. MS/MS spectra of the peptide TITLEVEPSDTIENVK(GG)AK with the ratio of 1:1, 1:5 and 1:10.

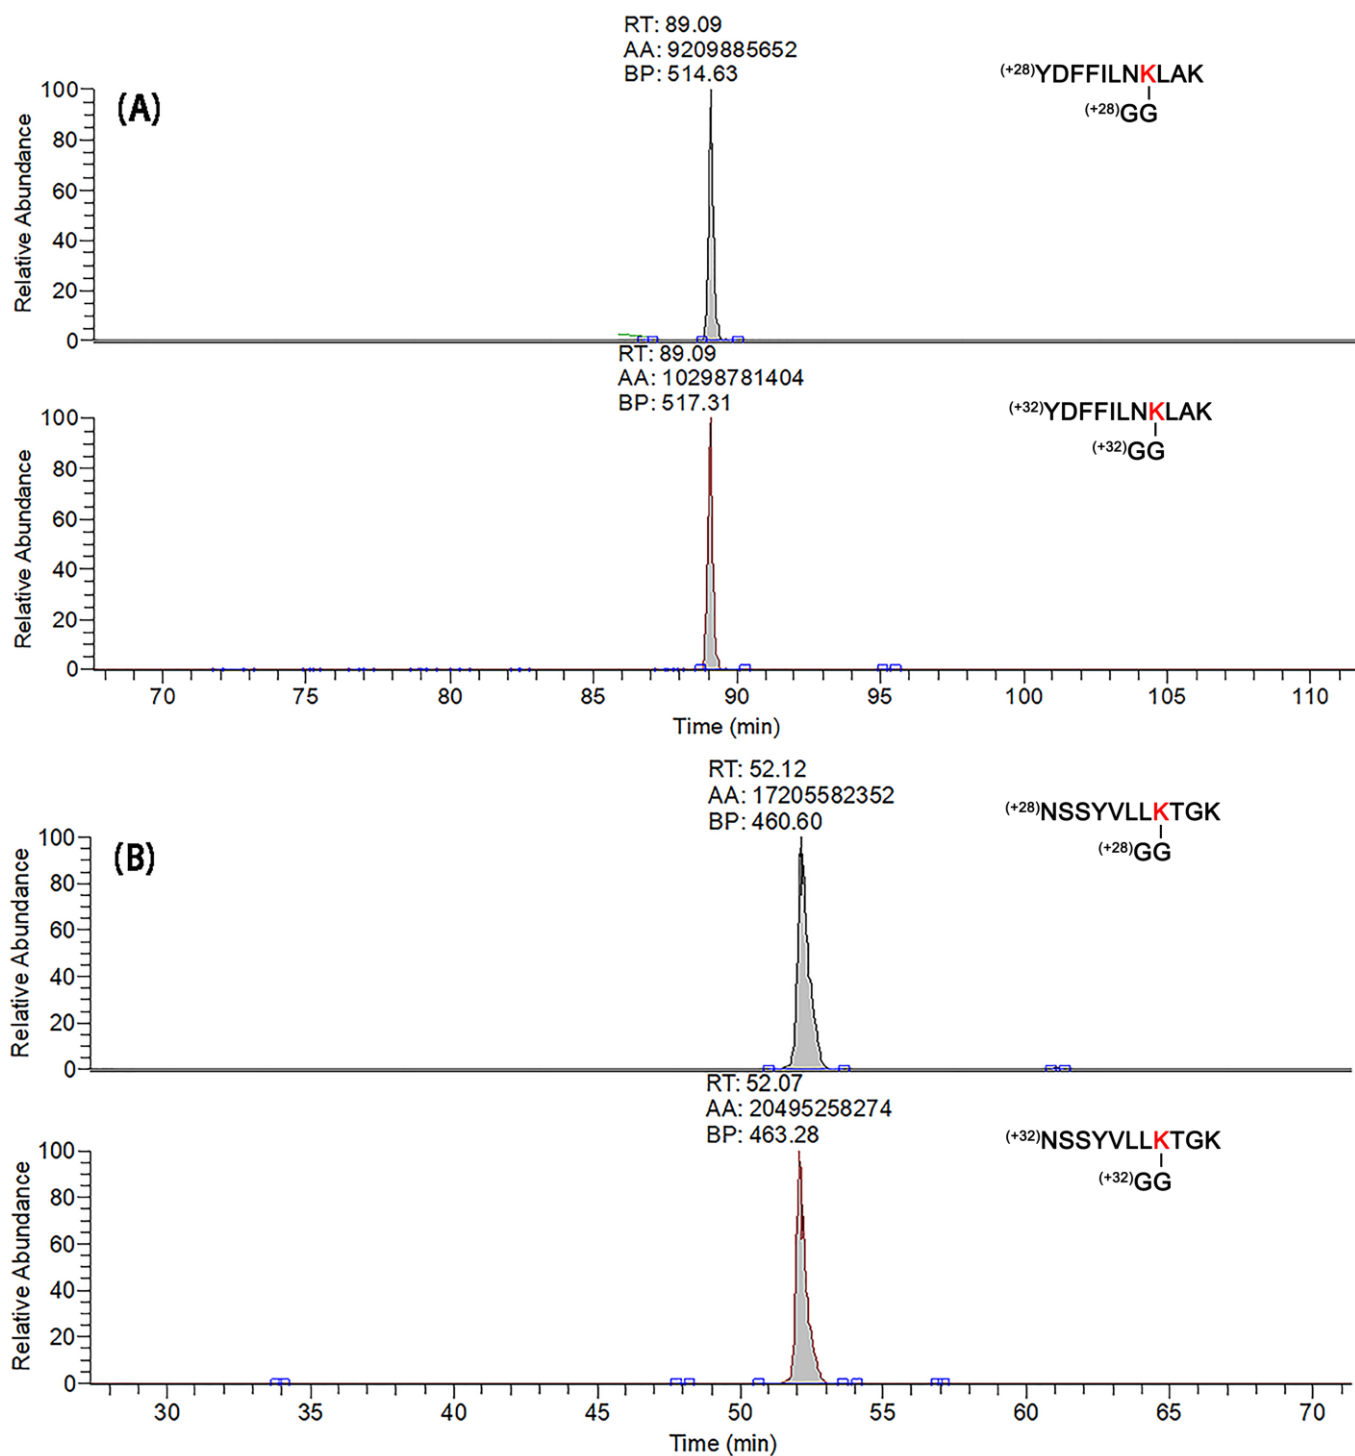

Figure S-10. The extracted ion chromatograms of standard internal K- $\epsilon$ -GG peptides (A) YDFFILNK (GG) LAK and (B) NSSYVLLK(GG)TGK.



Table S-1. SILAC labeling efficiency of MCF-7 cells.

| Identified peptides | Identified peptides with R <sup>4</sup> or K <sup>4</sup> | Labeled ratio (%) |
|---------------------|-----------------------------------------------------------|-------------------|
| 12147               | 12088                                                     | 99.5              |

Table S-2. Labeling efficiency of peptide N-terminus dimethylation.

|               | Labeled N-terminus | Non-labeled N-terminus | Labeled ratio (%) |
|---------------|--------------------|------------------------|-------------------|
| Supernatant 1 | 11857              | 80                     | 99.3              |
| Supernatant 2 | 11797              | 71                     | 99.4              |
| Supernatant 3 | 12106              | 94                     | 99.2              |
| Elute 1       | 2381               | 22                     | 99.1              |
| Elute 2       | 2511               | 18                     | 99.3              |
| Elute 3       | 2218               | 21                     | 99.1              |
